# Supplementary material for: Effects on gene expression and behavior of untagged short tandem repeats: the case of arginine vasopressin receptor 1a (AVPR1a) and externalizing behaviors
Source: PubMed Central journal article supplement (PMC5913313; doi:10.1038/s41398-018-0120-z), 2018-03-27

## SUPPLEMENTARY INFORMATION

**Supplementary Table 1.** Summary of samples, and the genotyping and analysis performed for each.

| Sample                      |               | Sample Size | AVPR1a SNPs Genotyped | AVPR1a STRs Genotyped | Analysis                                                                                                    |
|-----------------------------|---------------|-------------|-----------------------|-----------------------|-------------------------------------------------------------------------------------------------------------|
| Finnish Caucasians          |               | 661         | 8                     | 3                     | <ul style="list-style-type: none"> <li>• Behavioral Association</li> <li>• Genotype Correlations</li> </ul> |
| Post-Mortem Hippocampal RNA | HBCC          | 23          | 21                    | 3                     | • DAE                                                                                                       |
|                             | NIH Neurobank | 9           | 1 (DAE Reporter SNP)  | 3                     | • DAE                                                                                                       |

**Supplementary Table 2.** Demographic information for Finnish Caucasians

|                   | Cases    | Controls |
|-------------------|----------|----------|
| N                 | 264      | 397      |
| Male (%)          | 254 (96) | 304 (77) |
| Mean Age in years | 34.9     | 40.3     |

**Supplementary Table 3.** Primer and reporter sequences for rs1042615 Custom Taqman Genotyping Assay

| Assay Name                 | Primer  | Primer Sequence      | Reporter | Reporter Name | Dye | Reporter Sequence |
|----------------------------|---------|----------------------|----------|---------------|-----|-------------------|
| ANFVKX2 (AVPR1a/rs1042615) | Forward | GTGCCGCGTGGTGAAG     | 1        | ANFVKX2_M     | FAM | CGACGCGAACATG     |
|                            | Reverse | GTCGGCTGTCATGACTACCA | 2        | ANFVKX2_V     | VIC | CGACGCAACATG      |

**Supplementary Table 4.** Primers used for STR genotyping.

| STR | Primer                                                                             |
|-----|------------------------------------------------------------------------------------|
| RS1 | 5'-AGGGACTGGTTCTACAATCTGC-3' (forward)<br>5'-ACCTCTCAAGTTATGTTGGTGG-3' (reverse)   |
| RS3 | 5'-TGCTCAAAGGCACACTGTTCTCA-3' (forward)<br>5'-TTGGGAATCTGGTCAGGTAAGTG-3' (reverse) |
| AVR | 5'-ATCCCATGTCCGTCTGGACCG-3' (forward)<br>5'-AGTGTTCTCCAAGGTGCGAC-3' (reverse)      |

**Supplementary Table 5.** STR Mismatch Rates in Finnish pedigree sample (N= 145)

| STR | # of Alleles showing non-Mendelian transmission | Mismatch Rate |
|-----|-------------------------------------------------|---------------|
| RS1 | 1                                               | 0.003         |
| AVR | 0                                               | 0             |
| RS3 | 6                                               | 0.02          |

**Supplementary Figure 1.** Differential allelic expression observed for each of the three *AVPR1α* STR loci. STR risk alleles are not independently strongly associated with DAE for RS1 ( $p=0.530$ ), AVR ( $p=0.086$ ), and RS3 ( $p=0.043$ ) respectively. Each dot represents one subject.

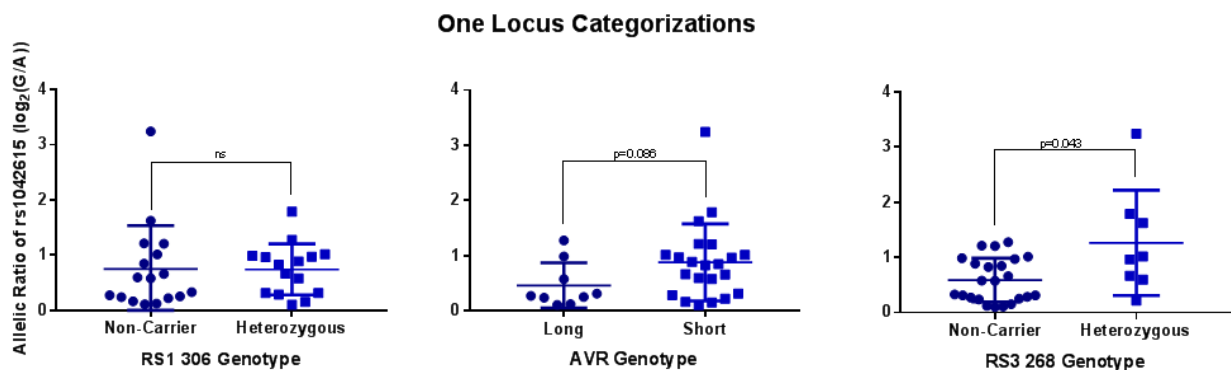

**Supplementary Figure 2.** Allele-dose-dependent association of the RS1 306 allele and AVR Short allele with externalizing behaviors.

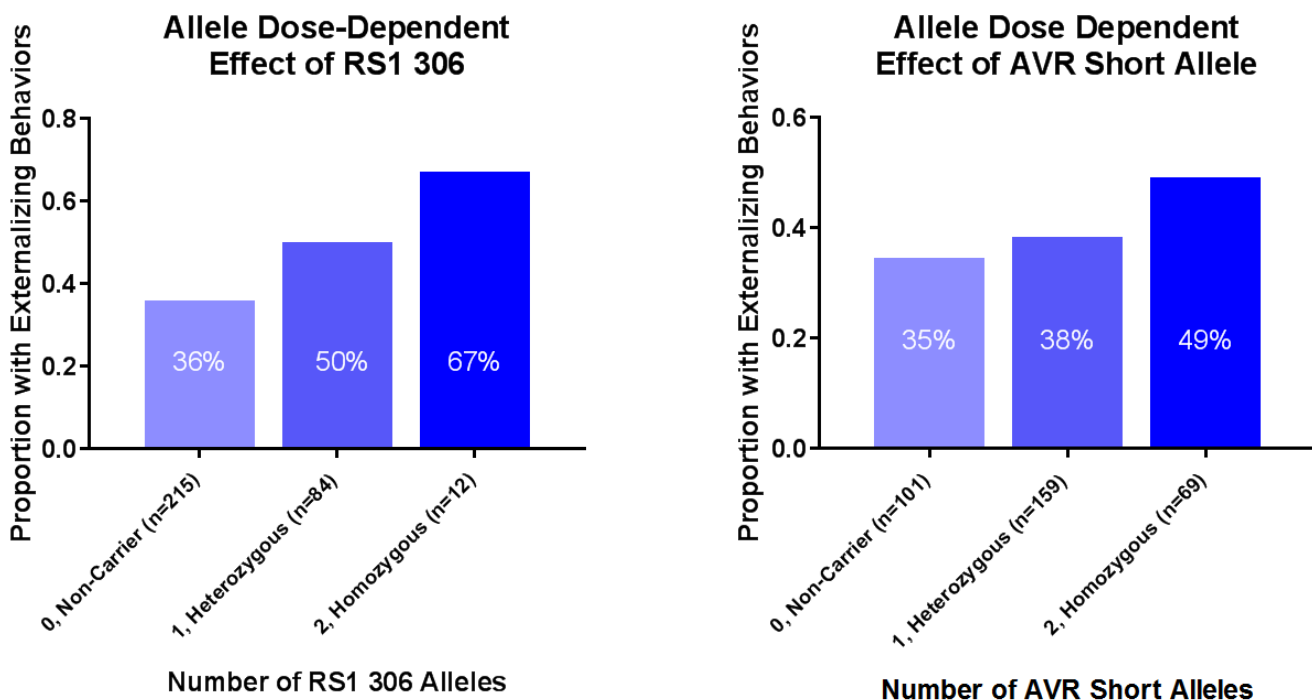

**Supplementary Figure 3.** STR genotypes and SNP genotypes are not highly correlated. Haplotype reconstruction was attempted with the unphased genotypes of the 311 unrelated Finnish Caucasians and the maximum likelihood of haplotype estimates is shown. **a.** SNP genotypes do not predict STR genotypes. Median maximum likelihood for all subjects (“Total”) was 0.34. Of these subjects that had genotyped STRs and SNPs, the maximum likelihood was higher (“With STRs”: median = 0.71) relative to those for whom only the SNP genotypes were known (“Without STRs”: median = 0.042). **b.** STR genotypes do not predict each other. AVR, RS3, and SNP genotypes cannot predict RS1 genotypes (median maximum likelihood = 0.25), RS1, RS3, and SNP genotypes cannot predict AVR genotypes (median maximum likelihood = 0.42), and RS1, AVR, and SNP genotypes cannot predict RS3 genotypes (median maximum likelihood = 0.31).

**a**

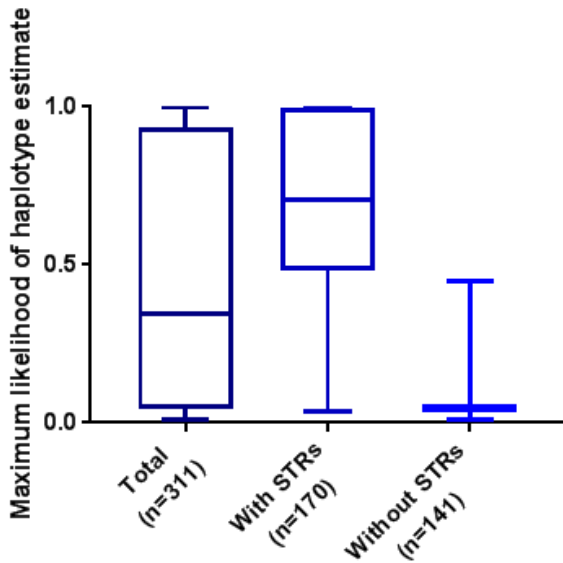

**b**

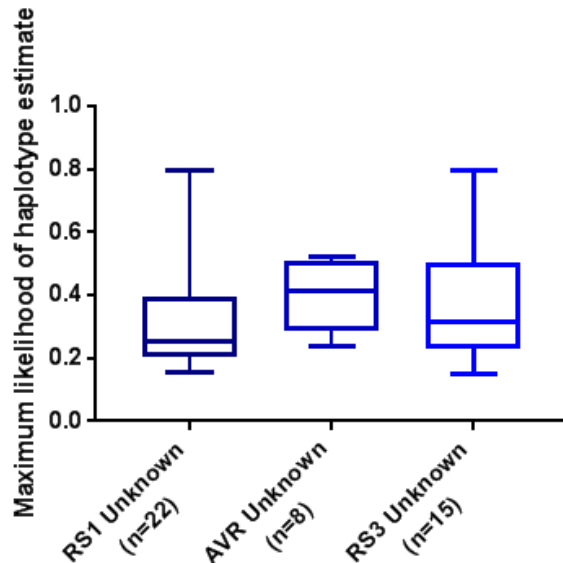

Supplement: 41398_2018_120_MOESM1_ESM.pdf [file 41398_2018_120_MOESM1_ESM.pdf]
